# Supplementary material for: Proteomics in Patients with Fibromyalgia Syndrome: A Systematic Review of Observational Studies
Source: Springer Nature journal article supplement (doi:10.1007/s11916-024-01244-4), 2024-04-23
Supplement: MOESM1 [file 27007826]

## Supplementary tables

**Supplementary Table 1.** PEO components of the study's research question.

|          |                   |                                                                                                                                                                                                                                                |
|----------|-------------------|------------------------------------------------------------------------------------------------------------------------------------------------------------------------------------------------------------------------------------------------|
| <b>P</b> | <b>Population</b> | Adult patients                                                                                                                                                                                                                                 |
| <b>E</b> | <b>Exposure</b>   | Fibromyalgia                                                                                                                                                                                                                                   |
| <b>O</b> | <b>Outcomes</b>   | - Identification of proteins isolated in plasma, serum, saliva, cerebrospinal fluid with proteomics methodologies<br>- Association of such proteins with age, gender, disease activity scores, quality of life scores and severity of symptoms |

PEO, Population – Exposure – Outcomes.

**Supplementary Table 2.** Basic terms and key words used in the search strategy.

| <b>Terms</b>      | <b>Fibromyalgia</b>       | <b>Proteomics</b>       | <b>Biologic fluids</b>     |
|-------------------|---------------------------|-------------------------|----------------------------|
| <b>Free text</b>  | Fibromyalgia [tiab]       | Proteomic* [tiab]       | Serum [tiab]               |
|                   | FM [tiab]                 | Proteome* [tiab]        | Saliva* [tiab]             |
|                   | FMS [tiab]                | Biomarker* [tiab]       | Plasma [tiab]              |
|                   | Fibromyositis [tiab]      | Peptide [tiab]          | Cerebrospinal fluid [tiab] |
|                   | Fibrositis [tiab]         |                         | CSF [tiab]                 |
|                   |                           |                         | Blood [tiab]               |
| <b>MeSH Terms</b> | Fibromyalgia"[MeSH Terms] | Proteomics"[MeSH Terms] |                            |
| <b>Excluded</b>   | NOT animal                |                         |                            |

CSF, Cerebrospinal fluid; FM, fibromyalgia; FMS, fibromyalgia syndrome; MeSH, Medical Subject Headings.

**Supplementary Table 3.** Search syntaxes used in PubMed and CENTRAL databases.

|                                                                                                         |                                                                                                                                                                                                                                                                                                                                                                                                                                                                                                                                                                                                                                                                                                                                                                                                                                                                                                                                  |
|---------------------------------------------------------------------------------------------------------|----------------------------------------------------------------------------------------------------------------------------------------------------------------------------------------------------------------------------------------------------------------------------------------------------------------------------------------------------------------------------------------------------------------------------------------------------------------------------------------------------------------------------------------------------------------------------------------------------------------------------------------------------------------------------------------------------------------------------------------------------------------------------------------------------------------------------------------------------------------------------------------------------------------------------------|
| <p><b>PubMed</b></p>   | <p>(((((((((Fibromyalgia[Title/Abstract]) OR (FM[Title/Abstract])) OR (FMS[Title/Abstract])) OR (Fibrositis[Title/Abstract])) OR (fibromyositis[Title/Abstract])) OR (fibromyalgia[MeSH Terms])) AND (((((proteomics[MeSH Terms]) OR (proteomic*[Title/Abstract])) OR (proteome*[Title/Abstract])) OR (biomarker*[Title/Abstract])) OR (peptide[Title/Abstract])))) AND ((((((serum[Title/Abstract]) OR (saliva*[Title/Abstract])) OR (CSF[Title/Abstract])) OR (cerebrospinal fluid[Title/Abstract])) OR (plasma[Title/Abstract])) OR (blood[Title/Abstract])))) NOT (animal[Title/Abstract]))</p>                                                                                                                                                                                                                                                                                                                              |
| <p><b>CENTRAL</b></p>  | <p>#1 (fibromyalgia):ti,ab,kw =3407<br/>         #2(FMS):ti,ab,kw =832<br/>         #3(Fibromyositis):ti,ab,kw =4<br/>         #4(fibrositis):ti,ab,kw =981<br/>         #5 MeSH descriptor: [Fibromyalgia] explode all trees =1610<br/>         #6 #1 OR #2 OR #3 OR #4 OR #5 =4958<br/>         #7 (proteomic*):ti,ab,kw =1263<br/>         #8 (proteome):ti,ab,kw =1422<br/>         #9 (biomarker*):ti,ab,kw =47531<br/>         #10 MeSH descriptor [Proteomics] in all MeSH products =165<br/>         #11 #7 OR #8 OR #9 OR #10 =48414<br/>         #12 (blood):ti,ab,kw =405438<br/>         #13 (plasma):ti,ab,kw 108769<br/>         #14 (CSF):ti,ab,kw =8795<br/>         #15 (Cerebrospinal fluid):ti,ab,kw =4545<br/>         #16 (saliva*):ti,ab,kw = 13290<br/>         #17 (serum):ti,ab,kw =114885<br/>         #18 #12 OR #13 OR #14 OR #15 OR #16 OR #17 =490316<br/>         #19 #6 AND #11 AND #18 =131</p> |

CENTRAL, Cochrane Central Register of Controlled Trials.

**Supplementary Table 4.** List of excluded studies.

| First author, publication year | Title                                                                                                                                                                                                                       | Reason for exclusion                                                                     |
|--------------------------------|-----------------------------------------------------------------------------------------------------------------------------------------------------------------------------------------------------------------------------|------------------------------------------------------------------------------------------|
| Al-Nimer M, 2018               | Serum levels of serotonin as a biomarker of newly diagnosed fibromyalgia in women: Its relation to the platelet indices.                                                                                                    | Not proteomics, uses ELISA to measure serotonin                                          |
| Anderberg U, 1999              | Elevated plasma levels of neuropeptide Y in female fibromyalgia patients.                                                                                                                                                   | No use of proteomics, RIA                                                                |
| Ang D, 2011                    | MCP-1 and IL-8 as pain biomarkers in fibromyalgia: a pilot study.                                                                                                                                                           | No use of proteomics                                                                     |
| Applbaum E, 2019               | Novel Sjögren's autoantibodies found in fibromyalgia patients with sicca and/or xerostomia.                                                                                                                                 | No use of proteomics                                                                     |
| Bazzichi L, 2013               | A multidisciplinary approach to study the effects of balneotherapy and mud-bath therapy treatments on fibromyalgia.                                                                                                         | RCT, non-observational                                                                   |
| Bennett R, 1990                | Low levels of somatomedin C in patients with the fibromyalgia syndrome. A possible link between sleep and muscle pain.                                                                                                      | No use of proteomics, RIA                                                                |
| Bjersing J, 2012               | Changes in pain and insulin-like growth factor 1 in fibromyalgia during exercise: the involvement of cerebrospinal inflammatory factors and neuropeptides.                                                                  | RCT, non-observational, non- proteomics, ELISA                                           |
| Bjersing J, 2017               | Benefits of resistance exercise in lean women with fibromyalgia: involvement of IGF-1 and leptin.                                                                                                                           | Substudy of an RCT, of interventional design, no proteomics results, ELISA               |
| Blanco I, 2010                 | Low plasma levels of monocyte chemoattractant protein-1 (MCP-1), tumor necrosis factor-alpha (TNFalpha), and vascular endothelial growth factor (VEGF) in patients with alpha1-antitrypsin deficiency-related fibromyalgia. | No use of proteomics, assesses MCP1, TNFa and VEGF in AAT deficient FM and HC with ELISA |
| Bote M, 2012                   | Inflammatory/stress feedback dysregulation in women with fibromyalgia.                                                                                                                                                      | No use of proteomics                                                                     |
| Bozkurt M, 2014                | Serum prolidase enzyme activity and oxidative status in patients with fibromyalgia.                                                                                                                                         | No use of proteomics                                                                     |
| Caboni P, 2014                 | Metabolomics analysis and modeling suggest a lysophosphocholines-PAF receptor interaction in fibromyalgia.                                                                                                                  | Lipidomics                                                                               |
| Cê P, 2018                     | Salivary Levels of Interleukin-1 $\beta$ in Temporomandibular Disorders and Fibromyalgia.                                                                                                                                   | Uses ELISA for IL-1b, no use of proteomics                                               |
| Clos-Garcia M, 2019            | Gut microbiome and serum metabolome analyses identify molecular biomarkers and altered glutamate metabolism in fibromyalgia.                                                                                                | Not relevant results                                                                     |
| Cordero M, 2014                | NLRP3 inflammasome is activated in fibromyalgia: the effect of coenzyme Q10.                                                                                                                                                | No use of proteomics                                                                     |

| First author, publication year | Title                                                                                                                                                               | Reason for exclusion                                                              |
|--------------------------------|---------------------------------------------------------------------------------------------------------------------------------------------------------------------|-----------------------------------------------------------------------------------|
| Costa A, 2022                  | Heart Rate Variability and Salivary Biomarkers Differences between Fibromyalgia and Healthy Participants after an Exercise Fatigue Protocol: An Experimental Study. | No use of proteomics                                                              |
| Čulić O, 2016                  | Serum activities of adenosine deaminase, dipeptidyl peptidase IV and prolyl endopeptidase in patients with fibromyalgia: diagnostic implications.                   | No use of proteomics                                                              |
| Dos Santos J, 2022             | Oxidative Stress Biomarkers and Quality of Life Are Contributing Factors of Muscle Pain and Lean Body Mass in Patients with Fibromyalgia.                           | No use of proteomics                                                              |
| Elkfury J, 2021                | Dysfunctional eating behavior in fibromyalgia and its association with serum biomarkers of brain plasticity (BDNF and S100B): an exploratory study.                 | No use of proteomics                                                              |
| Furer V, 2018                  | Elevated Levels of Eotaxin-2 in Serum of Fibromyalgia Patients.                                                                                                     | No use of proteomics, assesses specific protein levels with ELISA                 |
| Garcia J, 2014                 | Soluble fractalkine in the plasma of fibromyalgia patients.                                                                                                         | ELISA, not proteomics                                                             |
| Garcia J, 2014                 | Altered profile of chemokines in fibromyalgia patients.                                                                                                             | ELISA, not proteomics                                                             |
| Gerra M, 2021                  | A family-based study to identify genetic biomarkers of fibromyalgia: consideration of patients' subgroups.                                                          | Gene analysis, no use of proteomics                                               |
| Giacomelli C, 2011             | [MALDI-TOF and SELDI-TOF analysis: "tandem" techniques to identify potential biomarker in fibromyalgia].                                                            | Foreign language                                                                  |
| Hackshaw K, 2019               | Metabolic fingerprinting for diagnosis of fibromyalgia and other rheumatologic disorders.                                                                           | Not relevant results                                                              |
| Höcherl K, 2000                | Effect of tropisetron on circulating catecholamines and other putative biochemical markers in serum of patients with fibromyalgia.                                  | No use of proteomics, ELISA                                                       |
| Iannuccelli C, 2010            | Pathophysiology of fibromyalgia: a comparison with the tension-type headache, a localized pain syndrome.                                                            | Assesses cytokines in TTH, FM, HC. No proteomics                                  |
| Iannuccelli C, 2022            | Gender influence on clinical manifestations, depressive symptoms and brain-derived neurotrophic factor (BDNF) serum levels in patients affected by fibromyalgia.    | No use of proteomics, measures BDNF with ELISA and compares between FM/HC and F/M |
| Jacobsen S, 1990               | Primary fibromyalgia: clinical parameters in relation to serum procollagen type III aminoterminal peptide.                                                          | No use of proteomics                                                              |
| Jensen L, 1988                 | Serum procollagen type III aminoterminal peptide in primary fibromyalgia (fibrositis syndrome).                                                                     | No use of proteomics, RIA                                                         |

| First author, publication year | Title                                                                                                                                                                           | Reason for exclusion                                                                                  |
|--------------------------------|---------------------------------------------------------------------------------------------------------------------------------------------------------------------------------|-------------------------------------------------------------------------------------------------------|
| Karatas G, 2020                | Dynamic thiol and disulphide homoeostasis in fibromyalgia.                                                                                                                      | No use of proteomics, assesses the imbalance between thiol/disulfide levels between FM and a controls |
| Khamisy-Farah R, 2021          | Inflammatory Markers in the Diagnosis of Fibromyalgia.                                                                                                                          | No use of proteomics                                                                                  |
| Koca T, 2019                   | The Importance of G-protein Coupled Estrogen Receptor in Patients With Fibromyalgia.                                                                                            | No use of proteomics                                                                                  |
| Korucu R, 2020                 | Serum Calcitonin Gene-Related Peptide and Receptor Protein Levels in Patients With Fibromyalgia Syndrome: A Cross-Sectional Study.                                              | No use of proteomics                                                                                  |
| Kutu F, 2019                   | Pro-inflammatory Cytokines and Oxidized Low-Density-Lipoprotein in Patients With Fibromyalgia.                                                                                  | No use of proteomics, measures specific protein levels with ELISA                                     |
| Lin X, 2022                    | AKAP12 and RNF11 as Diagnostic Markers of Fibromyalgia and Their Correlation with Immune Infiltration.                                                                          | Uses artificial intelligence to test genes that could be related with FM. No use of proteomics.       |
| Martínez-Lara A, 2020          | Mitochondrial Imbalance as a New Approach to the Study of Fibromyalgia.                                                                                                         | No use of proteomics                                                                                  |
| Mease P, 2009                  | Fibromyalgia syndrome module at OMERACT 9: domain construct.                                                                                                                    | No use of proteomics                                                                                  |
| Menzies V, 2013                | Psychoneuroimmunological relationships in women with fibromyalgia.                                                                                                              | No proteomics, correlates blood parameters assessed with ELISA with questionnaires and symptoms       |
| NCT00810329                    | Proteomics of Cerebrospinal Fluid in Chronic Fatigue Syndrome.                                                                                                                  | Pooling FM patients with CFS                                                                          |
| Otero M, 2005                  | Ghrelin plasmatic levels in patients with fibromyalgia.                                                                                                                         | No use of proteomics, RIA                                                                             |
| Raffaeli W, 2020               | Identification of MOR-Positive B Cell as Possible Innovative Biomarker (Mu Lympho-Marker) for Chronic Pain Diagnosis in Patients with Fibromyalgia and Osteoarthritis Diseases. | Flow cytometry, not proteomics                                                                        |
| Ranzolin A, 2016               | Evaluation of cytokines, oxidative stress markers and brain-derived neurotrophic factor in patients with fibromyalgia - A controlled cross-sectional study.                     | No use of proteomics, ELISA                                                                           |
| Ribeiro V, 2018                | Inflammatory biomarkers responses after acute whole body vibration in fibromyalgia.                                                                                             | No use of proteomics, ELISA                                                                           |

| First author, publication year | Title                                                                                                                                                                                             | Reason for exclusion                                              |
|--------------------------------|---------------------------------------------------------------------------------------------------------------------------------------------------------------------------------------------------|-------------------------------------------------------------------|
| Rus A, 2016                    | Nitric Oxide, Inflammation, Lipid Profile, and Cortisol in Normal- and Overweight Women with Fibromyalgia.                                                                                        | No use of proteomics                                              |
| Rus A, 2022                    | CGRP, VEGF, and Clinical Manifestations in Women with Fibromyalgia.                                                                                                                               | No use of proteomics, measures specific protein levels with ELISA |
| Sarchielli, P, 2006            | Glial Cell Line-Derived Neurotrophic Factor and Somatostatin Levels in Cerebrospinal Fluid of Patients Affected by Chronic Migraine and Fibromyalgia.                                             | No use of proteomics                                              |
| Soldatelli M, 2021             | Mapping of predictors of the disengagement of the descending inhibitory pain modulation system in fibromyalgia: an exploratory study.                                                             | No use of proteomics                                              |
| Stensson, 2018                 | The Relationship of Endocannabinoidome Lipid Mediators with Pain and Psychological Stress in Women with Fibromyalgia: A Case-Control Study.                                                       | Lipidomics                                                        |
| Sugimoto C, 2015               | Mucosal-associated invariant T cell is a potential marker to distinguish fibromyalgia syndrome from arthritis.                                                                                    | No use of proteomics, flow cytometry                              |
| Tander B, 2007                 | Serum ghrelin levels but not GH, IGF-1 and IGFBP-3 levels are altered in patients with fibromyalgia syndrome.                                                                                     | Uses ELISA and RIA, no use of proteomics                          |
| Theoharides T, 2009            | Mast Cells, Neuroinflammation and Pain in Fibromyalgia Syndrome.                                                                                                                                  | Literature review, no use of proteomics methodology               |
| Vaerøy H, 1989                 | Modulation of pain in fibromyalgia (fibrositis syndrome): cerebrospinal fluid (CSF) investigation of pain related neuropeptides with special reference to calcitonin gene related peptide (CGRP). | No use of proteomics, RIA                                         |

AAT, alpha1-antitrypsin; AKAP12, A-Kinase Anchoring Protein 12; BDNF, brain-derived neurotrophic factor; CGRP, calcitonin gene related peptide; CFS, Chronic Fatigue Syndrome; CSF, Cerebrospinal fluid; ELISA, enzyme-linked immunoassay; FM, fibromyalgia; GH, growth hormone; HC, healthy controls; IGF-1, insulin-growth factor 1; IGFBP-3, Insulin-Like Growth Factor-Binding Protein 3; IL-1 $\beta$ , Interleukin-1 $\beta$ ; IL-8, interleukin 8; MCP-1, monocyte chemoattractant protein-1; OMERACT, outcome measures in rheumatology; PAF, Platelet-activating factor; RCT, randomized-controlled trial; RIA, radioimmunoassay; RNF-11, RING Finger 11; TNF $\alpha$ , tumor necrosis factor-alpha; TTH, tension-type headache; VEGF, vascular endothelial growth factor.

**Supplementary Table 5.** Exclusion criteria used for the selection of participants with FMS in each study.

| Study               | Exclusion criteria                                                                                                                                                                                                                                                                                                                                                                          |
|---------------------|---------------------------------------------------------------------------------------------------------------------------------------------------------------------------------------------------------------------------------------------------------------------------------------------------------------------------------------------------------------------------------------------|
| Bazzichi [39]       | Other connective tissue diseases, severe heart, lung, liver or kidney diseases, secondary FMS.                                                                                                                                                                                                                                                                                              |
| Ciregia [38]        | Patients older than 65 years, potential or existing pregnancy and lactation, active rheumatic disease, psychiatric disorders, infectious diseases.                                                                                                                                                                                                                                          |
| Fineschi [37]       | Chronic inflammatory diseases, autoimmune diseases, malignancy, major depression, use of corticosteroids or immunosuppressants, active infection, positive ANA, high CRP, positive IgM, RF and anti-CCP.                                                                                                                                                                                    |
| Han [46]            | Psychiatric disorders (schizophrenia, schizotypal disorder), alcohol or substance abuse, active malignancy, major rheumatic disease (SLE, RA, SS, SpA), pregnancy.                                                                                                                                                                                                                          |
| Hsu [45]            | Active infection, malignancy or history of major surgery.                                                                                                                                                                                                                                                                                                                                   |
| Khoonsari [41]      | Psychiatric illnesses, dementia, epilepsy, alcohol or substance abuse.                                                                                                                                                                                                                                                                                                                      |
| Khoonsari [42]      | Patients with RA had no neurological diseases, while the other group had no chronic pain disorders.                                                                                                                                                                                                                                                                                         |
| Ramirez-Tejero [40] | DM, hypertension, cancer, ischemic heart disease, pregnancy, lactation, obesity.                                                                                                                                                                                                                                                                                                            |
| Ruggiero [43]       | Severe comorbidities.                                                                                                                                                                                                                                                                                                                                                                       |
| Wahlen [44]         | Hypertension, osteoarthritis of the hip or knee, alcohol abuse, participation in a rehabilitation program within the previous year, regular exercise (resistance exercise), inability to understand the language, NSAIDs or hypnotics, rheumatic and neurological diseases (RA, SLE, MS), DM, CVD, serious psychiatric disorders (psychosis, major depressive disorder, anxiety disorders). |

ANA, antinuclear antibodies; anti-CCP, Anti-cyclic citrullinated peptide; BDNF, brain-derived neurotrophic factor; CRP, c-reactive protein; CVD, cardiovascular disease; DM, diabetes mellitus; FMS, fibromyalgia syndrome; IgM, Immunoglobulin M; MS, multiple sclerosis; NSAIDs, Non-steroidal anti-inflammatory drugs; RA, rheumatoid arthritis; RF, rheumatoid factor; SLE, systematic lupus erythematosus; SpA, ankylosing spondylitis; SS, Sjögren's syndrome.



**Supplementary Table 6.** Significance (*p*-values) and fold change in proteins observed in saliva samples of patients with FMS against other groups.

| Protein name                               | Abbreviation | UniProt       | vs. healthy controls |             | vs. Rheumatoid arthritis |             | vs. Migraine    |             | Reference            |
|--------------------------------------------|--------------|---------------|----------------------|-------------|--------------------------|-------------|-----------------|-------------|----------------------|
|                                            |              |               | <i>p</i> -value      | Fold change | <i>p</i> -value          | Fold change | <i>p</i> -value | Fold change |                      |
| Transaldolase                              | TALDO        | P37837        | <0.0001              | +3.02       | -                        | -           | -               | -           | Bazzichi [39]        |
| Phosphoglycerate mutase-1                  | PGAM1        | P18669        | 0.0011               | +2.5        | -                        | -           | -               | -           | Bazzichi [39]        |
| Proteasome subunit- $\alpha$ -type-2       | PSMA2        | P25787        | 0.026                | +3.4        | -                        | -           | -               | -           | Bazzichi [39]        |
| Rho GDP-dissociation inhibitor 2           | RhoGDI2      | P52566        | 0.024                | +2          | -                        | -           | -               | -           | Bazzichi [39]        |
| Haptoglobin-related protein precursor      | HPR          | P00739        | 0.003                | +5.2        | -                        | -           | -               | -           | Bazzichi [39]        |
| Cofilin-1                                  | CFL1         | P23528        | 0.07                 | +2.7        | -                        | -           | -               | -           | Bazzichi [39]        |
| Cyclophilin A                              | CyPA         | P62937        | 0.05                 | +2.1        | -                        | -           | -               | -           | Bazzichi [39]        |
| Cyclophilin A                              | CyPA         | P62937        | 0.016                | +2.1        | -                        | -           | -               | -           | Bazzichi [39]        |
| Profilin-1                                 | PFN1         | P07737        | 0.018                | +2          | -                        | -           | -               | -           | Bazzichi [39]        |
| Calgranulin A                              | S100-A8      | P05109        | 0.0036               | +2.6        | -                        | -           | -               | -           | Bazzichi [39]        |
| Calgranulin A                              | S100-A8      | P05109        | 0.0002               | +4.7        | -                        | -           | -               | -           | Bazzichi [39]        |
| Calgranulin C                              | S100-A12     | P80511        | 0.001                | +12.9       | -                        | -           | -               | -           | Bazzichi [39]        |
| <i>Gelsolin</i>                            | <i>GSN</i>   | <i>A2A418</i> | <i>NS</i>            | <i>+1.2</i> | -                        | -           | -               | -           | <i>Bazzichi [39]</i> |
| $\alpha$ -amylase 1                        | AMY1A        | P04745        | 0.0012               | +1.6        | NS                       | NS          | 0.0045          | +1.6        | Ciregia [38]         |
| $\alpha$ -amylase 1                        | AMY1A        | P04745        | 0.0002               | +1.8        | 0.006                    | -1.5        | 0.0024          | +1.4        | Ciregia [38]         |
| $\alpha$ -amylase 1                        | AMY1A        | P04745        | 0.00025              | +2.3        | 0.04                     | -1.3        | 0.026           | +1.6        | Ciregia [38]         |
| $\alpha$ -amylase 1                        | AMY1A        | P04745        | 0.0035               | +2.5        | 0.0025                   | -2.1        | NS              | NS          | Ciregia [38]         |
| $\alpha$ -amylase 1                        | AMY1A        | P04745        | 0.002                | +2.0        | 0.0054                   | -1.9        | 0.045           | +1.6        | Ciregia [38]         |
| $\alpha$ -amylase 1                        | AMY1A        | P04745        | 0.00027              | +2.4        | 0.013                    | -1.7        | 0.009           | +1.8        | Ciregia [38]         |
| $\alpha$ -enolase                          | ENO1         | P06733        | 0.0013               | +1.7        | 0.03                     | +1.3        | 0.009           | +1.6        | Ciregia [38]         |
| <i>Glucosamine-6-phosphate isomerase 1</i> | <i>GNP1</i>  | <i>P46926</i> | <i>NS</i>            | <i>NS</i>   | <i>0.0011</i>            | <i>-2</i>   | <i>0.012</i>    | <i>-1.6</i> | <i>Ciregia [38]</i>  |

| Protein name                                   | Abbreviation | UniProt       | vs. healthy controls |             | vs. Rheumatoid arthritis |             | vs. Migraine |             | Reference           |
|------------------------------------------------|--------------|---------------|----------------------|-------------|--------------------------|-------------|--------------|-------------|---------------------|
|                                                |              |               | p-value              | Fold change | p-value                  | Fold change | p-value      | Fold change |                     |
| Glutathione S-transferase P                    | GSTP         | P09211        | 0.005                | +1.7        | NS                       | NS          | NS           | NS          | Ciregia [38]        |
| <i>Heat shock protein <math>\beta</math>-1</i> | <i>HSPB1</i> | <i>P04792</i> | <i>NS</i>            | <i>NS</i>   | <i>0.009</i>             | <i>-1.7</i> | <i>NS</i>    | <i>NS</i>   | <i>Ciregia [38]</i> |
| <i>Ig <math>\alpha</math>-1 chain C region</i> | <i>IgAc1</i> | <i>P01876</i> | <i>NS</i>            | <i>NS</i>   | <i>0.000032</i>          | <i>-3.2</i> | <i>NS</i>    | <i>NS</i>   | <i>Ciregia [38]</i> |
| <i>Ig <math>\alpha</math>-1 chain C region</i> | <i>IgAc1</i> | <i>P01876</i> | <i>NS</i>            | <i>NS</i>   | <i>0.000037</i>          | <i>-2</i>   | <i>0.015</i> | <i>+1.4</i> | <i>Ciregia [38]</i> |
| Ig $\kappa$ chain C region                     | IgKC         | P01834        | 0.001                | +1.5        | NS                       | NS          | 0.0007       | +1.6        | Ciregia [38]        |
| Ig $\lambda$ -2 chain C regions                | IgLC2        | POCG05        | 0.0012               | +1.5        | NS                       | NS          | 0.016        | +1.4        | Ciregia [38]        |
| Phosphoglycerate mutase 1                      | PGAM1        | P18669        | 0.032                | +1.3        | NS                       | NS          | 0.04         | +1.3        | Ciregia [38]        |
| Transaldolase                                  | TALDO        | P37837        | 0.026                | +1.4        | NS                       | NS          | NS           | NS          | Ciregia [38]        |
| Polymeric Ig receptor precursor                | pIgR         | P01833        | 0.012                | -1.5        | 0.007                    | +2          | NS           | NS          | Ciregia [38]        |
| Polymeric Ig receptor precursor                | pIgR         | P01833        | 0.014                | -1.4        | NS                       | NS          | NS           | NS          | Ciregia [38]        |
| Polymeric Ig receptor precursor                | pIgR         | P01833        | 0.003                | -1.6        | 0.007                    | +1.8        | NS           | NS          | Ciregia [38]        |
| Serotransferrin                                | TRFE         | P02787        | 0.000007             | +2          | 0.004                    | +2.1        | 1.00e-06     | +2.4        | Ciregia [38]        |
| Serotransferrin                                | TRFE         | P02787        | 0.003                | +2          | 0.004                    | +2.1        | 1.70e-06     | +2.7        | Ciregia [38]        |
| Serotransferrin                                | TRFE         | P02787        | 0.009                | +1.6        | 0.00019                  | +2.3        | 1.30e-06     | +2          | Ciregia [38]        |
| Serotransferrin                                | TRFE         | P02787        | 0.00012              | +1.7        | 0.003                    | +2.1        | 9.00e-06     | +2.1        | Ciregia [38]        |
| Serum albumin                                  | ALB          | P02768        | 0.0085               | +2.4        | NS                       | NS          | 0.008        | +2.4        | Ciregia [38]        |
| Serum albumin                                  | ALB          | P02768        | 0.00033              | +2.3        | 0.0014                   | -2.1        | 0.039        | +1.6        | Ciregia [38]        |
| Cystatin-SN                                    | CYS          | P01037        | 0.001                | -2          | NS                       | NS          | 2.0e-05      | -2.1        | Ciregia [38]        |
| <i>Cystatin-SN</i>                             | <i>CYS</i>   | <i>P01037</i> | <i>NS</i>            | <i>NS</i>   | <i>NS</i>                | <i>NS</i>   | <i>0.02</i>  | <i>-1.5</i> | <i>Ciregia [38]</i> |
| Calgranulin-A                                  | S100-A8      | P05109        | 0.03                 | +1.4        | NS                       | NS          | NS           | NS          | Ciregia [38]        |

FMS, fibromyalgia syndrome; GDP, guanosine diphosphate; Ig, immunoglobulin; UniProt, Universal Protein Resource.

Proteins appearing more than one times correspond to different fragments. Proteins in blue and italic fonts were not significant compared to healthy controls.

**Supplementary Table 7.** Fold change, Q-value and VIP in proteins found in CSF samples of patients with FMS compared to controls.

| Protein name                                                         | Abbreviation    | UniProt    | Q-value | Fold change* | VIP | Reference      |
|----------------------------------------------------------------------|-----------------|------------|---------|--------------|-----|----------------|
| Apolipoprotein C-III                                                 | ApoC-III        | P02656     | 2.16E-3 | +2.3         | -   | Khoonsari [41] |
| Galectin-3-binding protein                                           | LG3BP           | Q08380     | 3.07E-2 | +1.05        | -   | Khoonsari [41] |
| ProSAAS                                                              | PCKS1           | P29120     | 2.16E-2 | +0.75        | -   | Khoonsari [41] |
| Malate dehydrogenase                                                 | MDH             | P40925     | 2.11E-5 | -2.03        | -   | Khoonsari [41] |
| Neural cell adhesion molecule L1                                     | L1CAM           | P32004     | -       | -            | 1.9 | Khoonsari [42] |
| Complement C4-A                                                      | C4A             | P0C0L4     | -       | -            | 1.8 | Khoonsari [42] |
| Lysozyme C                                                           | LYSC            | P61626     | -       | -            | 1.7 | Khoonsari [42] |
| Receptor-type tyrosine-protein phosphatase zeta                      | PTPRz           | P23471     | -       | -            | 1.7 | Khoonsari [42] |
| Apolipoprotein D                                                     | ApoD            | P05090     | -       | -            | 1.6 | Khoonsari [42] |
| $\alpha$ -1-antichymotrypsin                                         | $\alpha$ 1ACT   | P01011     | -       | -            | 1.5 | Khoonsari [42] |
| Progranulin                                                          | PGRN            | P28799     | -       | -            | 1.5 | Khoonsari [42] |
| Pro-low-density lipoprotein receptor-related protein 1               | LRP1            | Q07954     | -       | -            | 1.4 | Khoonsari [42] |
| Calcium/calmodulin-dependent protein kinase type II subunit $\alpha$ | CaMKII $\alpha$ | Unknown    | -       | -            | 1.5 | Khoonsari [42] |
| c-Kit                                                                | c-Kit           | A0A0U2N547 | -       | -            | 1.5 | Khoonsari [42] |

\*, fold change presented in logarithmic scale ( $\log_2$ ). CSF; Cerebrospinal fluid; FMS, fibromyalgia syndrome; UniProt, Universal Protein Resource; VIP, variable importance in projection.

Proteins with a VIP > 1.3 were considered as the most discriminative ones.

**Supplementary Table 8.** Significance (*p*-values), *pcorr*, fold change and VIP in proteins observed in plasma samples of patients with FMS against controls.

| Protein name                          | Abbreviation | UniProt | <i>p</i> -value | <i>pcorr</i> * | Fold change | VIP** | Reference           |
|---------------------------------------|--------------|---------|-----------------|----------------|-------------|-------|---------------------|
| Haptoglobin                           | HP           | P00738  | 7.95E-05        | -              | 2.54        | -     | Ramirez-Tejero [40] |
| Fibrinogen $\gamma$ chain             | FGG          | P02679  | 5.49E-03        | -              | 2.3         | -     | Ramirez-Tejero [40] |
| Actin, cytoplasmic 1                  | ACT          | P60709  | 1.11E-03        | -              | 2.26        | -     | Ramirez-Tejero [40] |
| Thrombospondin-1                      | THBS1        | P07996  | 3.33E-02        | -              | 2.21        | -     | Ramirez-Tejero [40] |
| Apolipoprotein L1                     | APOL1        | O14791  | 3.77E-04        | -              | 1.91        | -     | Ramirez-Tejero [40] |
| Serum amyloid A-4 protein             | SAA4         | P35542  | 3.43E-03        | -              | 1.89        | -     | Ramirez-Tejero [40] |
| Apolipoprotein C-II                   | APOC2        | P02655  | 1.15E-02        | -              | 1.83        | -     | Ramirez-Tejero [40] |
| Serotransferrin                       | TRFE         | P02787  | 1.30E-03        | -              | 1.83        | -     | Ramirez-Tejero [40] |
| Fibrinogen $\beta$ chain              | FGB          | P02675  | 4.38E-02        | -              | 1.78        | -     | Ramirez-Tejero [40] |
| Pregnancy zone protein                | PZP          | P20742  | 4.05E-03        | -              | 1.76        | -     | Ramirez-Tejero [40] |
| $\alpha$ -1-acid glycoprotein 2       | A1AGP2       | P19652  | 4.58E-03        | -              | 1.74        | -     | Ramirez-Tejero [40] |
| Ig $\alpha$ -1 chain C region         | IGAC         | P01876  | 3.09E-02        | -              | 1.74        | -     | Ramirez-Tejero [40] |
| Coagulation factor X                  | X            | P00742  | 9.92E-03        | -              | 1.63        | -     | Ramirez-Tejero [40] |
| $\alpha$ -1-acid glycoprotein 1       | A1AGP1       | P02763  | 2.27E-02        | -              | 1.58        | -     | Ramirez-Tejero [40] |
| $\alpha$ -2-macroglobulin             | A2M          | P01023  | 1.20E-02        | -              | 1.52        | -     | Ramirez-Tejero [40] |
| Ig mu chain C region                  | IGHM         | P01871  | 2.24E-02        | -              | 1.52        | -     | Ramirez-Tejero [40] |
| Complement C1s subcomponent           | C1S          | P09871  | 1.23E-04        | -              | 1.49        | -     | Ramirez-Tejero [40] |
| Serum amyloid P-component             | SAP          | P02743  | 2.44E-02        | -              | 1.48        | -     | Ramirez-Tejero [40] |
| Complement factor H                   | CFAH         | P08603  | 4.20E-03        | -              | 1.43        | -     | Ramirez-Tejero [40] |
| Complement component C7               | C7           | P10643  | 9.26E-03        | -              | 1.39        | -     | Ramirez-Tejero [40] |
| Complement C2                         | C2           | P06681  | 9.72E-03        | -              | 1.38        | -     | Ramirez-Tejero [40] |
| Vitamin K-dependent protein S         | PROS         | P07225  | 1.06E-02        | -              | 1.38        | -     | Ramirez-Tejero [40] |
| Coagulation factor IX                 | IX           | P00740  | 7.09E-03        | -              | 1.36        | -     | Ramirez-Tejero [40] |
| Complement C1q subcomponent subunit C | C1Qc         | P02747  | 1.55E-02        | -              | 1.35        | -     | Ramirez-Tejero [40] |

| Protein name                           | Abbreviation | UniProt | p-value  | pcorr* | Fold change | VIP** | Reference           |
|----------------------------------------|--------------|---------|----------|--------|-------------|-------|---------------------|
| Complement component C9                | C9           | P02748  | 7.31E-03 | -      | 1.33        | -     | Ramirez-Tejero [40] |
| Angiotensinogen                        | AGT          | P01019  | 3.98E-02 | -      | 0.73        | -     | Ramirez-Tejero [40] |
| Histidine-rich glycoprotein            | HRG          | P04196  | 2.90E-02 | -      | 0.7         | -     | Ramirez-Tejero [40] |
| Monocyte differentiation antigen CD14  | CD14         | P08571  | 5.95E-03 | -      | 0.67        | -     | Ramirez-Tejero [40] |
| Corticosteroid-binding globulin        | CBG          | P08185  | 2.78E-02 | -      | 0.66        | -     | Ramirez-Tejero [40] |
| Thyroxine-binding globulin             | THBG         | P05543  | 5.93E-03 | -      | 0.63        | -     | Ramirez-Tejero [40] |
| Protein Z-dependent protease inhibitor | ZPI          | Q9UK55  | 1.29E-02 | -      | 0.63        | -     | Ramirez-Tejero [40] |
| Fetuin-B                               | FETUB        | Q9UGM5  | 3.75E-03 | -      | 0.53        | -     | Ramirez-Tejero [40] |
| Carbonic anhydrase 1                   | CA           | P00915  | 4.06E-03 | -      | 0.47        | -     | Ramirez-Tejero [40] |
| Ig k chain C region                    | IgKC         | P01834  | -        | -0.56  | 0.40        | 1.92  | Wahlen [44]         |
| Serotransferrin                        | TRFE         | P02787  | -        | +0.47  | 1.50        | 1.61  | Wahlen [44]         |
| $\alpha$ -2-antiplasmin                | A2AP         | P08697  | -        | +0.46  | 2.04        | 1.58  | Wahlen [44]         |
| Complement C4-B (fragment)             | B4B          | POCOL5  | -        | -0.45  | 0.71        | 1.57  | Wahlen [44]         |
| Fibrinogen $\alpha$ chain (fragment)   | FGA          | P02671  | -        | -0.45  | 0.27        | 1.57  | Wahlen [44]         |
| Haptoglobin                            | HP           | P00738  | -        | +0.44  | 1.26        | 1.51  | Wahlen [44]         |
| Fibrinogen $\alpha$ chain              | FGA          | P02671  | -        | -0.43  | 0.34        | 1.49  | Wahlen [44]         |
| Serotransferrin                        | TRFE         | P02787  | -        | +0.43  | 1.17        | 1.48  | Wahlen [44]         |
| Complement C4-B (fragment)             | C4B          | POCOL5  | -        | +0.43  | 1.27        | 1.48  | Wahlen [44]         |
| Fibrinogen $\beta$ chain               | FGB          | P02675  | -        | +0.42  | 1.59        | 1.45  | Wahlen [44]         |
| $\alpha$ -1B-glycoprotein              | A1BG         | P04217  | -        | -0.41  | 0.87        | 1.43  | Wahlen [44]         |
| Fibrinogen $\alpha$ chain (fragment)   | FGA          | P02671  | -        | -0.4   | 0.55        | 1.37  | Wahlen [44]         |
| Plasminogen                            | PLG          | P00747  | -        | -0.4   | 0.84        | 1.37  | Wahlen [44]         |
| Complement C3 $\beta$ chain            | C3B          | P01024  | -        | +0.39  | 1.19        | 1.33  | Wahlen [44]         |
| Kininogen-1                            | KNG1         | P01042  | -        | -0.38  | 0.72        | 1.33  | Wahlen [44]         |
| Plasminogen                            | PLG          | P00747  | -        | -0.38  | 0.94        | 1.3   | Wahlen [44]         |

| Protein name                    | Abbreviation | UniProt | p-value | pcorr* | Fold change | VIP** | Reference   |
|---------------------------------|--------------|---------|---------|--------|-------------|-------|-------------|
| α-2-antiplasmin                 | A2AP         | P08697  | -       | -0.37  | 0.66        | 1.28  | Wahlen [44] |
| α-2-macroglobulin               | A2M          | P01023  | -       | -0.37  | 0.41        | 1.28  | Wahlen [44] |
| α-2-antiplasmin                 | A2AP         | P08697  | -       | -0.36  | 0.84        | 1.24  | Wahlen [44] |
| Fibrinogen α chain              | FGA          | P02671  | -       | -0.36  | 0.44        | 1.24  | Wahlen [44] |
| Complement C1r subcomponent     | C1R          | P00736  | -       | -0.34  | 0.85        | 1.17  | Wahlen [44] |
| Haptoglobin                     | HP           | P00738  | -       | +0.33  | 1.24        | 1.14  | Wahlen [44] |
| Plasminogen                     | PLG          | P00747  | -       | -0.33  | 0.91        | 1.12  | Wahlen [44] |
| Plasminogen                     | PLG          | P00747  | -       | -0.32  | 0.74        | 1.11  | Wahlen [44] |
| Ig κ chain C region             | IgKC         | P01834  | -       | -0.32  | 0.62        | 1.11  | Wahlen [44] |
| β-2-glycoprotein 1              | B2GP         | P02749  | -       | +0.31  | 1.10        | 1.06  | Wahlen [44] |
| Fibrinogen α chain (fragment)   | FGA          | P02671  | -       | -0.3   | 0.26        | 1.05  | Wahlen [44] |
| α-2-macroglobulin               | A2M          | P01023  | -       | -0.3   | 0.65        | 1.05  | Wahlen [44] |
| Complement factor I light chain |              | P05156  | -       | -0.3   | 0.88        | 1.05  | Wahlen [44] |
| Gelsolin                        | GSN          | P06396  | -       | +0.3   | 1.01        | 1.03  | Wahlen [44] |
| Apolipoprotein C-III            | APOC3        | P02656  | -       | -0.29  | 0.33        | 1.01  | Wahlen [44] |
| Complement C3b                  | C3B          | P01024  | -       | -0.29  | 0.73        | 1     | Wahlen [44] |
| Complement C1r subcomponent     | C1R          | P00736  | -       | -0.29  | 0.74        | 1     | Wahlen [44] |

\*, pcorr is presented and is the multivariate correlation coefficient of each variable (protein) for the model, with FMS being coded as 1, and HC as 0. Hence, a positive p(corr) for a variable indicates a positive multivariate correlation versus FMS belonging, and a negative p(corr), indicates a negative multivariate correlation with FMS.

\*\* , A VIP > 1 is indicative of a significant protein.

CD14, cluster of differentiation 14 molecule; FMS, fibromyalgia syndrome; pcorr, partial and semipartial correlation coefficients; UniProt, Universal Protein Resource; VIP, variable importance in projection.

**Supplementary Table 9.** Significance (*p*-value), protein levels, VIP, MS abundance, and fold change in proteins observed in serum samples of patients with FMS against controls.

| Protein name                                  | Abbreviation | UniProt | <i>p</i> -value | NPX*  |          | VIP  | MS AB             |                   | Fold change | Reference     |
|-----------------------------------------------|--------------|---------|-----------------|-------|----------|------|-------------------|-------------------|-------------|---------------|
|                                               |              |         |                 | FMS   | controls |      | FMS               | controls          |             |               |
| STAM-binding protein                          | STAMPB       | O95630  | 0.010           | 4.76  | 4.09     | -    | -                 | -                 | -           | Fineschi [37] |
| Axin-1                                        | AXIN1        | O15169  | 0.010           | 3.12  | 2.09     | -    | -                 | -                 | -           | Fineschi [37] |
| NAD-dependent protein deacetylase sirtuin-2   | SIRT2        | Q8IXJ6  | 0.010           | 4.39  | 3.43     | -    | -                 | -                 | -           | Fineschi [37] |
| Sulfotransferase 1A1                          | SULT1A1      | P50225  | 0.031           | 4.32  | 3.21     | -    | -                 | -                 | -           | Fineschi [37] |
| Stromelysin-2                                 | MMP-10       | P09238  | 0.044           | 9.96  | 9.51     | -    | -                 | -                 | -           | Fineschi [37] |
| Fibroblast growth factor 23                   | FGF-23       | Q9GZV9  | 0.044           | 1.83  | 1.64     | -    | -                 | -                 | -           | Fineschi [37] |
| IL-18 receptor 1                              | IL-18R1      | Q13478  | 0.044           | 9.17  | 8.82     | -    | -                 | -                 | -           | Fineschi [37] |
| TNF ligand superfamily member 14              | TNFSF14      | O43557  | 0.044           | 7.47  | 6.93     | -    | -                 | -                 | -           | Fineschi [37] |
| Fibroblast growth factor 21                   | FGF-21       | Q9NSA1  | 0.044           | 5.13  | 4.18     | -    | -                 | -                 | -           | Fineschi [37] |
| TNF                                           | TNF          | P01375  | 0.044           | 3.32  | 2.96     | -    | -                 | -                 | -           | Fineschi [37] |
| T-cell surface glycoprotein CD5               | CD5          | P06127  | 0.048           | 6.07  | 5.82     | -    | -                 | -                 | -           | Fineschi [37] |
| TNF receptor superfamily member 5             | CD40         | P25942  | 0.048           | 12.05 | 11.73    | -    | -                 | -                 | -           | Fineschi [37] |
| C-C motif chemokine 3                         | CCL3         | P10147  | 0.048           | 6.99  | 6.53     | -    | -                 | -                 | -           | Fineschi [37] |
| IL-10 receptor subunit $\beta$                | IL-10RB      | Q08334  | 0.048           | 6.76  | 6.54     | -    | -                 | -                 | -           | Fineschi [37] |
| Fibroblast growth factor 19                   | FGF-19       | O95750  | 0.048           | 9.51  | 8.78     | -    | -                 | -                 | -           | Fineschi [37] |
| TNF receptor superfamily member 9             | TNFRSF9      | Q07011  | 0.048           | 7.31  | 6.97     | -    | -                 | -                 | -           | Fineschi [37] |
| IL-8                                          | IL8          | P10145  | 0.048           | 7.30  | 6.83     | -    | -                 | -                 | -           | Fineschi [37] |
| Protein S100-A12                              | EN-RAGE      | P80511  | 0.048           | 5.99  | 5.25     | -    | -                 | -                 | -           | Fineschi [37] |
| Macrophage colony-stimulating factor 1        | CSF-1        | P09603  | 0.049           | 10.86 | 10.72    | -    | -                 | -                 | -           | Fineschi [37] |
| Hornerin                                      | HRNR         | Q86Y23  | <0.01           | -     | -        | 0.63 | 1.026 $\pm$ 1.485 | 0.502 $\pm$ 0.173 | +2.04       | Han [46]      |
| Histidine protein methyltransferase 1 homolog | HMT1         | O95568  | <0.005          | -     | -        | 1.69 | 1.055 $\pm$ 0.219 | 0.660 $\pm$ 0.175 | +1.60       | Han [46]      |

| Protein name                                         | Abbreviation | UniProt | p-value    | NPX* |          | VIP  | MS AB       |             | Fold change | Reference     |
|------------------------------------------------------|--------------|---------|------------|------|----------|------|-------------|-------------|-------------|---------------|
|                                                      |              |         |            | FMS  | controls |      | FMS         | controls    |             |               |
| Keratin, type II cytoskeletal 80                     | KRT80        | Q6KB66  | <0.05      | -    | -        | 0.57 | 1.112±1.067 | 0.749±0.209 | +1.49       | Han [46]      |
| Serum amyloid P-component                            | SAP          | P02743  | <0.01      | -    | -        | 0.88 | 1.100±0.383 | 0.788±0.390 | +1.40       | Han [46]      |
| Complement C4-A                                      | C4A          | P0C0L4  | <0.05      | -    | -        | 0.96 | 1.129±0.375 | 0.851±0.354 | +1.33       | Han [46]      |
| IL-1 receptor accessory protein                      | IL1RAP       | Q9NPH3  | <0.005     | -    | -        | 1.18 | 1.128±0.226 | 0.856±0.240 | +1.32       | Han [46]      |
| Transmembrane protease serine 13                     | TMPRSS1      | Q9BYE2  | <0.005     | -    | -        | 1.61 | 1.096±0.159 | 0.841±0.118 | +1.30       | Han [46]      |
| Low affinity Ig γ Fc region receptor III-B           | CD16B        | O75015  | <0.05      | -    | -        | 0.77 | 1.246±0.353 | 0.957±0.473 | +1.30       | Han [46]      |
| Low affinity Ig γ Fc region receptor III-A           | CD16A        | P08637  | <0.05      | -    | -        | 0.77 | 1.246±0.354 | 0.957±0.473 | +1.30       | Han [46]      |
| Serum amyloid A-4 protein                            | SAA4         | P35542  | <0.05      | -    | -        | 0.97 | 0.906±0.195 | 1.181±0.381 | -1.30       | Han [46]      |
| Ig λ chain V-IV region H1L                           | GLV3-25      | P01717  | <0.005     | -    | -        | 0.73 | 0.936±0.991 | 1.224±0.528 | -1.31       | Han [46]      |
| Platelet glycoprotein V                              | GP5          | P40197  | <0.005     | -    | -        | 1.07 | 0.895±0.258 | 1.176±0.281 | -1.31       | Han [46]      |
| Prothrombin                                          | F2           | P00734  | <0.05      | -    | -        | 0.79 | 0.919±0.331 | 1.207±0.581 | -1.31       | Han [46]      |
| Ig heavy chain V-I region HG3                        | HG3          | P01743  | <0.05      | -    | -        | 0.81 | 0.856±0.731 | 1.137±0.655 | -1.33       | Han [46]      |
| Putative V-set and Ig domain-containing-like-protein | GHV1OR21-1   | A6NJS3  | <0.05      | -    | -        | 0.82 | 0.850±0.732 | 1.150±0.695 | -1.35       | Han [46]      |
| Ig heavy chain V-I region V35                        | GHV1OR15-1   | P23083  | <0.05      | -    | -        | 0.82 | 0.850±0.732 | 1.150±0.695 | -1.35       | Han [46]      |
| Ig λ-2 chain C regions                               | GLC2         | P0CG05  | <0.05      | -    | -        | 0.76 | 0.862±0.609 | 1.172±0.518 | -1.36       | Han [46]      |
| Thrombospondin-2                                     | THBS2        | P35442  | <0.005     | -    | -        | 1.13 | 0.898±0.295 | 1.232±0.346 | -1.37       | Han [46]      |
| Fibrinogen α chain                                   | FGA          | P02671  | <0.05      | -    | -        | 0.81 | 0.867±0.490 | 1.201±0.464 | -1.39       | Han [46]      |
| Platelet glycoprotein Ib α chain                     | GP1BA        | P07359  | <0.01      | -    | -        | 1.29 | 0.847±0.169 | 1.193±0.333 | -1.41       | Han [46]      |
| Profilin-1                                           | PFN1         | P07737  | <0.01      | -    | -        | 1.07 | 0.900±0.205 | 1.336±0.563 | -1.49       | Han [46]      |
| Thrombospondin-1                                     | THBS1        | P07996  | <0.01      | -    | -        | 1.01 | 0.786±0.396 | 1.250±0.558 | -1.59       | Han [46]      |
| α1-antitrypsin                                       | AAT          | P01009  | 3.228e-005 | -    | -        | -    | -           | -           | +2          | Ruggiero [43] |
| Transthyretin                                        | TTR          | P02766  | 0.007      | -    | -        | -    | -           | -           | +1.3        | Ruggiero [43] |



| Protein name                                       | Abbreviation | UniProt | p-value | NPX* |          | VIP  | MS AB |          | Fold change | Reference     |
|----------------------------------------------------|--------------|---------|---------|------|----------|------|-------|----------|-------------|---------------|
|                                                    |              |         |         | FMS  | controls |      | FMS   | controls |             |               |
| Retinol binding protein 4                          | RBP4         | P02753  | 0.039   | -    | -        | -    | -     | -        | +1.3        | Ruggiero [43] |
| C1qC chain                                         | C1qC         | P02747  | -       | -    | -        | 1.92 | -     | -        | -           | Hsu [45]      |
| Protein S100-A7                                    | S100A7       | P31151  | -       | -    | -        | 2.32 | -     | -        | -           | Hsu [45]      |
| Serpin B3                                          | SEPRINB3     | P29508  | -       | -    | -        | 2.23 | -     | -        | -           | Hsu [45]      |
| Galectin 7                                         | Gal-7        | P47929  | -       | -    | -        | 4.09 | -     | -        | -           | Hsu [45]      |
| Lymphatic vessel endothelial hyaluronan receptor 1 | LYVE1        | Q9Y5Y7  | -       | -    | -        | 1.67 | -     | -        | -           | Hsu [45]      |
| Fibrinogen $\alpha$ chain                          | FGA          | P02671  | -       | -    | -        | 3.22 | -     | -        | -           | Hsu [45]      |
| Fibrinogen $\beta$ chain                           | FGB          | P02675  | -       | -    | -        | 4.29 | -     | -        | -           | Hsu [45]      |
| Fibrinogen $\gamma$ chain                          | FGG          | P02679  | -       | -    | -        | 4.38 | -     | -        | -           | Hsu [45]      |

\*, Protein levels expressed as NPX values (log2 scale); CD5, cluster of differentiation 5 molecule; FMS, fibromyalgia syndrome; Ig: Immunoglobulin; IL: Interleukin; MS AB, Mass spectrometry abundance; NAD, Nicotinamide adenine dinucleotide; NPX, normalized protein expression; TNF, Tumor necrosis factor; UniProt, Universal Protein Resource.
